# Supplementary material for: Population Pharmacokinetics Modelling and Simulation of Mitotane in Patients with Adrenocortical Carcinoma: An Individualized Dose Regimen to Target All Patients at Three Months?
Source: MDPI journal article supplement (doi:10.3390/pharmaceutics11110566), 2019-10-31
Supplement: s1 [file s1]

# Supplementary Materials: Population Pharmacokinetics Modelling and Simulation of Mitotane in Patients with Adrenocortical Carcinoma: An Individualized Dose Regimen to Target All Patients at Three Months?

Yoann Cazaubon, Yohann Talineau, Catherine Feliu, Céline Konecki, Jennifer Russello, Olivier Mathieu, and Zoubir Djerada

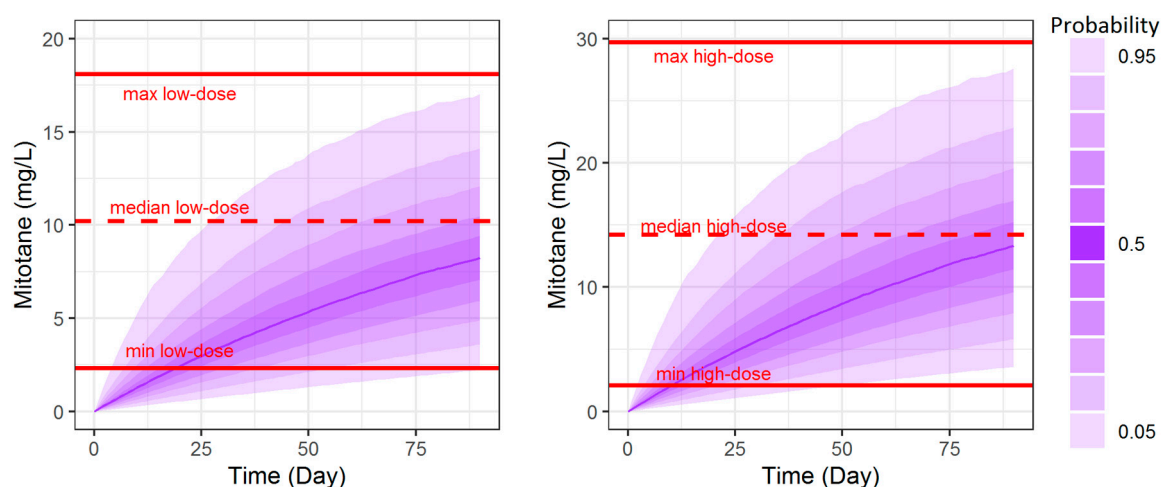

**Figure S1.** Comparison between simulated concentration profile from our final model versus median (min-max) value of mitotane at 84 days of therapy from study of Kerkhofs et al. [34].

**Table S1.** Summary of covariates model building and time-varying clearance.

| Model                           | Number of Covariates | -2LL | BIC  | ΔBIC | RSE of Parameters |
|---------------------------------|----------------------|------|------|------|-------------------|
| Basic model (1 cmt)             | 0                    | 3005 | 3027 |      | < 30%             |
| Tg on Cl (1cmt)                 | 1                    | 2994 | 3019 | -8   | < 30%             |
| Tg and HDL on Cl (1cmt)         | 2                    | 2988 | 3015 | -12  | < 30%             |
| Tg, HDL and Lcat2 on Cl (1cmt)  | 3                    | 2960 | 2093 | -34  | < 30%             |
| Basic model with TVC Equation 6 | 0                    | 2999 | 3030 | -3   | > 1000%           |
| Arshad et al.[16]               | 1                    | 3026 | 3051 | +24  | < 30%             |

Abbreviations are as follows: -2LL =  $-2 \times \log\text{likelihood}$ ;  $\Delta\text{BIC}$  = BIC (model step) – BIC (basic model); RSE, Relative standard error; BIC, Bayesian information criterion; lcat2, latent covariate; Tg, triglyceride; TVC, Time-varying clearance.

**Equation S1.** Summary of equations to model a time-varying clearance.

$$Cl_{linear} = Cl_{initial} + k_{out} \times TIME \quad (1)$$

$$Cl_{exp} = Cl_{initial} \times e^{k_{out} \times TIME} \quad (2)$$

$$Cl_{initial\_exp} = Cl_{initial} + Cl_{ss} \times e^{k_{out} \times TIME} \quad (3)$$

$$Cl_{concave} = Cl_{initial} + Cl_{ss} \times (1 - e^{-k_{out} \times TIME}) \quad (4)$$

$$Cl_{Emax} = Cl_{initial} + Cl_{ss} \times \left( \frac{TIME^\gamma}{TIME^\gamma + T50^\gamma} \right) \quad (5)$$

$$Cl_{pheno1} = Cl_{ss} - (Cl_{ss} - Cl_{initial}) \times \left( \frac{T12}{T12 + TIME} \right) \quad (6)$$

$$Cl_{pheno2} = Cl_{ss} - (Cl_{ss} - Cl_{initial}) \times e^{\left( \frac{-TIME}{T12} \right)} \quad (7)$$

$$Cl_{mecha} = Cl \times ddt_{Enz} \left\{ = K_{enz} - K_{enz} \times \left( 1 - \frac{Cc}{Cc + IC_{50}} \right) \times Enz \right\} \quad (8)$$

Abbreviations are as follows:  $Cl_{initial}$  clearance at time = 0,  $Cl_{ss}$  induced clearance,  $k_{out}$  rate constant for the change in clearance rate.  $\gamma$  gamma (shape factor),  $TIME$  time after first administration,  $T50$  time at which clearance of the  $Cl_{Emax}$  model reaches 50% of its final value,  $T12$  time scale at which clearance change,  $Cc$  mitotane plasma concentration,  $K_{enz}$ .
